# Supplementary material for: A Retrospective, Single-Center Analysis of Specialized Palliative Care Services for Patients with Advanced Small-Cell Lung Cancer
Source: MDPI journal article supplement (doi:10.3390/cancers14204988), 2022-10-12
Supplement: s1 [file s1]

## Supplemental material

**Supplemental Table S1.** Comparison of patients' characteristics among the four cutoff values.

|                                                              | Cutoff a<br>n = 42          | Cutoff b<br>n = 33         | Cutoff c<br>n = 40         | Cutoff d<br>n = 25       | <i>p-value</i> |
|--------------------------------------------------------------|-----------------------------|----------------------------|----------------------------|--------------------------|----------------|
| Age (years), median (range)                                  | 69 (39 – 88)                | 65 (39 – 85)               | 68 (39 – 88)               | 65 (39 – 85)             | n.s.*          |
| Male, n (%)                                                  | 21 (50)                     | 17 (51.5)                  | 22 (55)                    | 11 (44)                  | n.s.†          |
| Female, n (%)                                                | 21 (50)                     | 16 (48.5)                  | 18 (45)                    | 14 (56)                  | n.s.†          |
| UICC stage at diagnosis:                                     |                             |                            |                            |                          |                |
| - Stage III, n (%)                                           | 5 (11.9)                    | 6 (18.2)                   | 6 (15)                     | 4 (16)                   | n.s.‡          |
| - Stage IV, n (%)                                            | 37 (88.1)                   | 27 (81.8)                  | 34 (85)                    | 21 (84)                  | n.s.†          |
| History of smoking, n (%)                                    | 42 (100)                    | 33 (100)                   | 40 (100)                   | 25 (100)                 | n.s.†          |
| PD-L1 ≥ 1%, n (%)                                            | 9 (21.4)                    | 9 (27.3)                   | 11 (27.5)                  | 9 (36)                   | n.s.‡          |
| ECOG ≥ 2 at time of diagnosis, n (%) (n = 116)               | 12 (28.6) <sup>a,b,c</sup>  | 5 (15.2) <sup>a</sup>      | 6 (15) <sup>b</sup>        | 5 (20) <sup>c</sup>      | 0.002‡         |
| Metastatic disease at time of diagnosis:                     |                             |                            |                            |                          |                |
| - Bone, n (%)                                                | 12 (28.6)                   | 11 (33.3)                  | 13 (32.5)                  | 8 (32)                   | n.s.‡          |
| - Liver, n (%)                                               | 18 (42.9)                   | 11 (33.3)                  | 14 (35)                    | 7 (28)                   | n.s.‡          |
| - Lungs, n (%)                                               | 4 (9.5)                     | 4 (12.1)                   | 5 (12.5)                   | 2 (8)                    | n.s.‡          |
| - Pleura, n (%)                                              | 8 (19)                      | 4 (12.1)                   | 7 (17.5)                   | 4 (16)                   | n.s.‡          |
| - Brain, n (%)                                               | 12 (28.6) <sup>a,b,c</sup>  | 15 (45.5) <sup>a</sup>     | 17 (42.5) <sup>b</sup>     | 11 (44) <sup>c</sup>     | 0.019†         |
| - Extrathoracic lymph nodes, n (%)                           | 8 (19)                      | 7 (21.2)                   | 6 (15)                     | 6 (24)                   | n.s.‡          |
| - Adrenal glands, n (%)                                      | 13 (33.3)                   | 12 (36.4)                  | 15 (37.5)                  | 9 (36)                   | n.s.†          |
| Therapeutic approaches (first line):                         |                             |                            |                            |                          |                |
| - Surgery, n (%)                                             | 2 (4.8)                     | 2 (6.1)                    | 2 (5)                      | 1 (4)                    | n.s.‡          |
| - Radio-chemotherapy, n (%)                                  | 0                           | 0                          | 0                          | 0                        | -              |
| - Radiotherapy, n (%)                                        | 1 (2.4)                     | 0                          | 0                          | 0                        | -              |
| - Systemic antineoplastic therapy, n(%)                      | 31 (73.8) <sup>a,b,c</sup>  | 29 (87.9) <sup>a</sup>     | 36 (90) <sup>b</sup>       | 22 (88) <sup>c</sup>     | <0.001†        |
| - Best supportive care, n (%)                                | 8 (19) <sup>a,b,c</sup>     | 2 (6.1) <sup>a</sup>       | 2 (5) <sup>b</sup>         | 2 (8) <sup>c</sup>       | <0.001‡        |
| Referral indications:                                        |                             |                            |                            |                          |                |
| - Pain, n (%)                                                | 10 (23.8)                   | 10 (30.3)                  | 9 (22.5)                   | 7 (28)                   | n.s.‡          |
| - Dyspnea, n (%)                                             | 7 (16.7)                    | 3 (9.1)                    | 5 (12.5)                   | 3 (12)                   | n.s.‡          |
| - Other symptoms, n (%)                                      | 3 (7.1)                     | 3 (9.1)                    | 7 (17.5)                   | 3 (12)                   | ‡              |
| - Pain and additional other symptoms, n (%)                  | 1 (2.4)                     | 0                          | 1 (2.5)                    | 0                        | -              |
| - Dying patient, n (%)                                       | 2 (4.8)                     | 0                          | 0                          | 0                        | -              |
| - Social aspects, n (%)                                      | 1 (2.4)                     | 3 (9.1)                    | 3 (7.5)                    | 2 (8)                    | n.s.‡          |
| - General integration of PC, n (%)                           | 18 (42.9)                   | 14 (42.4)                  | 15 (37.5)                  | 10 (40)                  | n.s.†          |
| Duration of SPC services (days), median (range)              | 168 (1 – 1876)              | 74 (1 – 1876)              | 164 (27 – 956)             | 248 (129 – 956)          | n.s.*          |
| Time from diagnosis till start of SPC (days), median (range) | 6 (0 – 61) <sup>a,b,c</sup> | 32 (0 – 1315) <sup>a</sup> | 10 (0 – 1315) <sup>b</sup> | 8 (0 – 643) <sup>c</sup> | < 0.001‡       |

\*One-way ANOVA was applied, \*Kruskal-Wallis test was applied, †Chi-square test was applied, ‡Fisher Exact test was applied. <sup>a</sup> p < 0.05 cutoff a vs. cutoff b, <sup>b</sup> p < 0.05 cutoff a vs. cutoff c, <sup>c</sup> p < 0.05 cutoff a vs. cutoff d, UICC = Union Internationale Contre le Cancer, PD-L1 = programmed death-ligand 1, ECOG = Eastern Cooperative Oncology Group, SPC = specialized palliative care, PC = palliative care.

**Supplemental Table S2.** Comparison of patients' characteristics of early and late referral for SPC according to cutoff a.

| <b>Cutoff a (SPC &lt; 60 days after diagnosis)</b>           |                       |                      |                       |
|--------------------------------------------------------------|-----------------------|----------------------|-----------------------|
|                                                              | <b>Early (n = 42)</b> | <b>Late (n = 33)</b> | <b><i>p-value</i></b> |
| Age (years), median (range)                                  | 69 (39 – 88)          | 65 (46 – 86)         | n.s. <sup>†</sup>     |
| Male, n (%)                                                  | 21 (50)               | 24 (72.7)            | n.s.*                 |
| Female, n (%)                                                | 21 (50)               | 9 (27.3)             | n.s. <sup>#</sup>     |
| UICC stage at diagnosis:                                     |                       |                      |                       |
| - Stage III, n (%)                                           | 5 (11.9)              | 7 (21.2)             | n.s. <sup>#</sup>     |
| - Stage IV, n (%)                                            | 37 (88.1)             | 26 (78.8)            | n.s.*                 |
| History of smoking, n (%)                                    | 42 (100)              | 30 (90.9)            | n.s.*                 |
| PD-L1 ≥ 1%, n (%)                                            | 9 (21.4)              | 6 (18.2)             | n.s. <sup>#</sup>     |
| ECOG ≥ 2 at time of diagnosis, n (%) (n = 63)                | 12 (35.3)             | 2 (6.9)              | 0.007 <sup>#</sup>    |
| Metastatic disease at time of diagnosis:                     |                       |                      |                       |
| - Bone, n (%)                                                | 12 (28.6)             | 8 (24.2)             | n.s. <sup>#</sup>     |
| - Liver, n (%)                                               | 18 (42.9)             | 12 (36.4)            | n.s.*                 |
| - Lungs, n (%)                                               | 4 (9.5)               | 4 (12.1)             | n.s. <sup>#</sup>     |
| - Pleura, n (%)                                              | 8 (19)                | 1 (3)                | n.s. <sup>#</sup>     |
| - Brain, n (%)                                               | 12 (28.6)             | 16 (48.5)            | n.s.*                 |
| - Extrathoracic lymph nodes, n (%)                           | 8 (19)                | 5 (15.2)             | n.s. <sup>#</sup>     |
| - Adrenal glands, n (%)                                      | 14 (33.3)             | 9 (27.3)             | n.s. <sup>#</sup>     |
| Therapeutic approaches (first line):                         |                       |                      |                       |
| - Surgery, n (%)                                             | 2 (4.6)               | 0                    | n.s. <sup>#</sup>     |
| - Radiotherapy, n (%)                                        | 1 (2.4)               | 1 (3)                | n.s. <sup>#</sup>     |
| - Systemic antineoplastic therapy, n(%)                      | 31 (73.9)             | 31 (93.9)            | n.s.*                 |
| - Best supportive care, n (%)                                | 8 (19)                | 1 (3)                | n.s. <sup>#</sup>     |
| Referral indications:                                        |                       |                      |                       |
| - Pain, n (%)                                                | 10 (23.8)             | 11 (33.3)            | n.s. <sup>#</sup>     |
| - Dyspnea, n (%)                                             | 7 (16.7)              | 1 (3)                | n.s. <sup>#</sup>     |
| - Other symptoms, n (%)                                      | 3 (7.1)               | 12 (36.4)            | 0.003 <sup>#</sup>    |
| - Pain and additional other symptoms, n (%)                  | 1 (2.4)               | 3 (9.1)              | n.s. <sup>#</sup>     |
| - Dying patient, n (%)                                       | 2 (4.8)               | 1 (3)                | n.s. <sup>#</sup>     |
| - Social aspects, n (%)                                      | 1 (2.4)               | 3 (9.1)              | n.s. <sup>#</sup>     |
| - General integration of PC, n (%)                           | 18 (42.9)             | 2 (6.1)              | < 0.001 <sup>#</sup>  |
| Duration of SPC services (days), median (range)              | 168 (1 – 1876)        | 31 (1 – 752)         | 0.016 <sup>†</sup>    |
| Time from diagnosis till start of SPC (days), median (range) | 5.5 (1 – 61)          | 302 (46 – 1315)      | < 0.001 <sup>†</sup>  |
| Survival time (months), median (range)                       | 5 (0 – 61)            | 12 (0 – 44)          | 0.007 <sup>‡</sup>    |

<sup>†</sup>Mann-Whitney-U test was applied, \*chi-square test was applied, <sup>#</sup>Fisher's exact test was applied, <sup>‡</sup>log-rank test was applied. UICC = Union Internationale Contre le Cancer, PD-L1 = Programmed death-ligand 1, ECOG = Eastern Cooperative Oncology Group, SPC = Specialized palliative care.

**Supplemental Table S3.** Comparison of patients' characteristics of early and late referral for SPC according to cutoff b.

| <b>Cutoff b (≥ 60 days before death)</b>                     |                       |                      |                       |
|--------------------------------------------------------------|-----------------------|----------------------|-----------------------|
|                                                              | <b>Early (n = 33)</b> | <b>Late (n = 32)</b> | <b><i>p-value</i></b> |
| Age (years), median (range)                                  | 65 (39 – 85)          | 67 (46 – 88)         | n.s. <sup>†</sup>     |
| Male, n (%)                                                  | 17 (51.5)             | 24 (75)              | n.s. <sup>*</sup>     |
| Female, n (%)                                                | 16 (48.5)             | 8 (25)               | n.s. <sup>#</sup>     |
| UICC stage at diagnosis:                                     |                       |                      |                       |
| - Stage III, n (%)                                           | 6 (18.2)              | 4 (12.5)             | n.s. <sup>#</sup>     |
| - Stage IV, n (%)                                            | 27 (81.8)             | 28 (87.5)            | n.s. <sup>*</sup>     |
| History of smoking, n (%)                                    | 33 (100)              | 30 (93.8)            | n.s. <sup>*</sup>     |
| PD-L1 ≥ 1%, n (%)                                            | 9 (27.3)              | 5 (15.6)             | n.s. <sup>#</sup>     |
| ECOG ≥ 2 at time of diagnosis, n (%) (n = 54)                | 5 (17.9)              | 4 (15.4)             | n.s. <sup>#</sup>     |
| Metastatic disease at time of diagnosis:                     |                       |                      |                       |
| - Bone, n (%)                                                | 11 (33.3)             | 9 (28.1)             | n.s. <sup>#</sup>     |
| - Liver, n (%)                                               | 11 (33.3)             | 16 (50)              | n.s. <sup>*</sup>     |
| - Lungs, n (%)                                               | 4 (12.1)              | 1 (3.1)              | n.s. <sup>#</sup>     |
| - Pleura, n (%)                                              | 8 (19)                | 1 (3)                | n.s. <sup>#</sup>     |
| - Brain, n (%)                                               | 15 (45.5)             | 11 (34.4)            | n.s. <sup>*</sup>     |
| - Extrathoracic lymph nodes, n (%)                           | 7 (21.2)              | 3 (9.4)              | n.s. <sup>#</sup>     |
| - Adrenal glands, n (%)                                      | 10 (23.8)             | 11 (33.3)            | n.s. <sup>#</sup>     |
| Therapeutic approaches (first line):                         |                       |                      |                       |
| - Surgery, n (%)                                             | 2 (6.1)               | 0                    | n.s. <sup>#</sup>     |
| - Radiotherapy, n (%)                                        | 0                     | 1 (3.1)              | n.s. <sup>#</sup>     |
| - Systemic antineoplastic therapy, n(%)                      | 29 (87.9)             | 25 (78.1)            | n.s. <sup>*</sup>     |
| - Best supportive care, n (%)                                | 2 (6.1)               | 6 (18.8)             | n.s. <sup>#</sup>     |
| Referral indications:                                        |                       |                      |                       |
| - Pain, n (%)                                                | 10 (30.3)             | 9 (28.1)             | n.s. <sup>#</sup>     |
| - Dyspnea, n (%)                                             | 3 (9.1)               | 5 (15.6)             | n.s. <sup>#</sup>     |
| - Other symptoms, n (%)                                      | 3 (9.1)               | 10 (31.3)            | 0.033 <sup>#</sup>    |
| - Pain and additional other symptoms, n (%)                  | 1 (2.4)               | 3 (9.1)              | n.s. <sup>#</sup>     |
| - Dying patient, n (%)                                       | 0                     | 3 (9.4)              | n.s. <sup>#</sup>     |
| - Social aspects, n (%)                                      | 3 (9.1)               | 1 (3.1)              | n.s. <sup>#</sup>     |
| - General integration of PC, n (%)                           | 14 (42.4)             | 2 (6.3)              | < 0.001 <sup>#</sup>  |
| Duration of SPC services (days), median (range)              | 200 (60 – 965)        | 15 (1 – 59)          | < 0.001 <sup>†</sup>  |
| Time from diagnosis till start of SPC (days), median (range) | 8 (1 – 643)           | 117 (1 – 1315)       | 0.012 <sup>†</sup>    |
| Survival time (months), median (range)                       | 8 (2 – 46)            | 3 (0 – 44)           | 0.025 <sup>‡</sup>    |

<sup>†</sup>Mann-Whitney-U test was applied, <sup>\*</sup>chi-square test was applied, <sup>#</sup>Fisher's exact test was applied, <sup>‡</sup>log-rank test was applied. UICC = Union Internationale Contre le Cancer, PD-L1 = Programmed death-ligand 1, ECOG = Eastern Cooperative Oncology Group, SPC = Specialized palliative care.

**Supplemental Table S4.** Comparison of patients' characteristics of early and late referral for SPC according to cutoff c.

| <b>Cutoff c (<math>\geq 30</math> days before death)</b>     |                       |                      |                       |
|--------------------------------------------------------------|-----------------------|----------------------|-----------------------|
|                                                              | <b>Early (n = 40)</b> | <b>Late (n = 25)</b> | <b><i>p-value</i></b> |
| Age (years), median (range)                                  | 68.5 (39 – 88)        | 63.5 (46 – 77)       | n.s. <sup>†</sup>     |
| Male, n (%)                                                  | 22 (55)               | 19 (76)              | n.s.*                 |
| Female, n (%)                                                | 18 (45)               | 6 (24)               | n.s. <sup>#</sup>     |
| UICC stage at diagnosis:                                     |                       |                      |                       |
| - Stage III, n (%)                                           | 6 (15)                | 4 (16)               | n.s. <sup>#</sup>     |
| - Stage IV, n (%)                                            | 34 (85)               | 21 (84)              | n.s.*                 |
| History of smoking, n (%)                                    | 40 (100)              | 23 (92)              | n.s.*                 |
| PD-L1 $\geq 1\%$ , n (%)                                     | 11 (27.5)             | 3 (12)               | n.s. <sup>#</sup>     |
| ECOG $\geq 2$ at time of diagnosis, n (%) (n = 54)           | 6 (17.6)              | 3 (15)               | n.s. <sup>#</sup>     |
| Metastatic disease at time of diagnosis:                     |                       |                      |                       |
| - Bone, n (%)                                                | 13 (32.5)             | 7 (28)               | n.s. <sup>#</sup>     |
| - Liver, n (%)                                               | 14 (35)               | 13 (52)              | n.s.*                 |
| - Lungs, n (%)                                               | 5 (12.5)              | 0                    | n.s. <sup>#</sup>     |
| - Pleura, n (%)                                              | 7 (17.5)              | 2 (8)                | n.s. <sup>#</sup>     |
| - Brain, n (%)                                               | 17 (42.5)             | 9 (36)               | n.s. <sup>#</sup>     |
| - Extrathoracic lymph nodes, n (%)                           | 6 (15)                | 4 (16)               | n.s. <sup>#</sup>     |
| - Adrenal glands, n (%)                                      | 15 (37.5)             | 6 (24)               | n.s. <sup>#</sup>     |
| Therapeutic approaches (first line):                         |                       |                      |                       |
| - Surgery, n (%)                                             | 2 (5)                 | 0                    | n.s. <sup>#</sup>     |
| - Radiotherapy, n (%)                                        | 0                     | 1 (4)                | n.s. <sup>#</sup>     |
| - Systemic antineoplastic therapy, n(%)                      | 36 (90)               | 18 (72)              | n.s.*                 |
| - Best supportive care, n (%)                                | 2 (5)                 | 6 (24)               | n.s. <sup>#</sup>     |
| Referral indications:                                        |                       |                      |                       |
| - Pain, n (%)                                                | 9 (22.5)              | 10 (40)              | n.s. <sup>#</sup>     |
| - Dyspnea, n (%)                                             | 5 (12.5)              | 3 (12)               | n.s. <sup>#</sup>     |
| - Other symptoms, n (%)                                      | 7 (17.5)              | 6 (24)               | n.s. <sup>#</sup>     |
| - Pain and additional other symptoms, n (%)                  | 1 (2.5)               | 1 (4)                | n.s. <sup>#</sup>     |
| - Dying patient, n (%)                                       | 0                     | 3 (12)               | n.s. <sup>#</sup>     |
| - Social aspects, n (%)                                      | 3 (7.5)               | 1 (4)                | n.s. <sup>#</sup>     |
| - General integration of PC, n (%)                           | 15 (37.5)             | 1 (4)                | 0.002 <sup>#</sup>    |
| Duration of SPC services (days), median (range)              | 164.5 (31 – 965)      | 11 (1 – 29)          | < 0.001 <sup>†</sup>  |
| Time from diagnosis till start of SPC (days), median (range) | 10 (1 – 1315)         | 191(1 – 647)         | 0.038 <sup>†</sup>    |
| Survival time (months), median (range)                       | 8 (0 – 46)            | 6 (0 – 21)           | 0.025 <sup>‡</sup>    |

<sup>†</sup>Mann-Whitney-U test was applied, \*chi-square test was applied, <sup>#</sup>Fisher's exact test was applied, <sup>‡</sup>log-rank test was applied. UICC = Union Internationale Contre le Cancer, PD-L1 = Programmed death-ligand 1, ECOG = Eastern Cooperative Oncology Group, SPC = Specialized palliative care.

**Supplemental Table S5.** Comparison of patients' characteristics of early and late referral for SPC according to cutoff d.

| <b>Cutoff d (≥ 120 days before death)</b>                    |                       |                      |                       |
|--------------------------------------------------------------|-----------------------|----------------------|-----------------------|
|                                                              | <b>Early (n = 25)</b> | <b>Late (n = 40)</b> | <b><i>p-value</i></b> |
| Age (years), median (range)                                  | 65 (39 – 85)          | 67 (46 – 88)         | n.s. <sup>†</sup>     |
| Male, n (%)                                                  | 11 (44)               | 30 (75)              | n.s.*                 |
| Female, n (%)                                                | 14 (56)               | 10 (25)              | n.s. <sup>#</sup>     |
| UICC stage at diagnosis:                                     |                       |                      |                       |
| - Stage III, n (%)                                           | 4 (16)                | 6 (15)               | n.s. <sup>#</sup>     |
| - Stage IV, n (%)                                            | 21 (84)               | 34 (85)              | n.s.*                 |
| History of smoking, n (%)                                    | 25 (100)              | 38 (95)              | n.s.*                 |
| PD-L1 ≥ 1%, n (%)                                            | 9 (36)                | 5 (12.5)             | n.s. <sup>#</sup>     |
| ECOG ≥ 2 at time of diagnosis, n (%) (n = 54)                | 5 (22.7)              | 4 (12.5)             | n.s. <sup>#</sup>     |
| Metastatic disease at time of diagnosis:                     |                       |                      |                       |
| - Bone, n (%)                                                | 8 (32)                | 12 (30)              | n.s. <sup>#</sup>     |
| - Liver, n (%)                                               | 7 (28)                | 20 (50)              | n.s. <sup>#</sup>     |
| - Lungs, n (%)                                               | 2 (8)                 | 3 (7.5)              | n.s. <sup>#</sup>     |
| - Pleura, n (%)                                              | 4 (16)                | 5 (12.5)             | n.s. <sup>#</sup>     |
| - Brain, n (%)                                               | 11 (44)               | 15 (37.5)            | n.s. <sup>#</sup>     |
| - Extrathoracic lymph nodes, n (%)                           | 6 (24)                | 4 (10)               | n.s. <sup>#</sup>     |
| - Adrenal glands, n (%)                                      | 9 (36)                | 12 (30)              | n.s. <sup>#</sup>     |
| Therapeutic approaches (first line):                         |                       |                      |                       |
| - Surgery, n (%)                                             | 1 (4)                 | 1 (2.5)              | n.s. <sup>#</sup>     |
| - Radiotherapy, n (%)                                        | 0                     | 1 (2.5)              | n.s. <sup>#</sup>     |
| - Systemic antineoplastic therapy, n(%)                      | 22 (88)               | 32 (80)              | n.s.*                 |
| - Best supportive care, n (%)                                | 2 (8)                 | 6 (15)               | n.s. <sup>#</sup>     |
| Referral indications:                                        |                       |                      |                       |
| - Pain, n (%)                                                | 7 (28)                | 12 (30)              | n.s. <sup>#</sup>     |
| - Dyspnea, n (%)                                             | 3 (12)                | 5 (12.5)             | n.s. <sup>#</sup>     |
| - Other symptoms, n (%)                                      | 3 (12)                | 10 (25)              | n.s. <sup>#</sup>     |
| - Pain and additional other symptoms, n (%)                  | 0                     | 2 (5)                | n.s. <sup>#</sup>     |
| - Dying patient, n (%)                                       | 0                     | 3 (7.5)              | n.s. <sup>#</sup>     |
| - Social aspects, n (%)                                      | 2 (8)                 | 2 (5)                | n.s. <sup>#</sup>     |
| - General integration of PC, n (%)                           | 10 (40)               | 5 (15)               | 0.037 <sup>#</sup>    |
| Duration of SPC services (days), median (range)              | 248 (129 – 965)       | 18 (1 – 98)          | < 0.001 <sup>†</sup>  |
| Time from diagnosis till start of SPC (days), median (range) | 8 (1 – 643)           | 73 (1 – 1315)        | n.s. <sup>†</sup>     |
| Survival time (months), median (range)                       | 9 (4 – 46)            | 3 (0 – 44)           | 0.003 <sup>‡</sup>    |

<sup>†</sup>Mann-Whitney-U test was applied, \*chi-square test was applied, <sup>#</sup>Fisher's exact test was applied, <sup>‡</sup>log-rank test was applied. UICC = Union Internationale Contre le Cancer, PD-L1 = Programmed death-ligand 1, ECOG = Eastern Cooperative Oncology Group, SPC = Specialized palliative care.
